# Supplementary material
Source: Hindawi journal article supplement (doi:10.1155/2011/846716)

Supp fig. 1

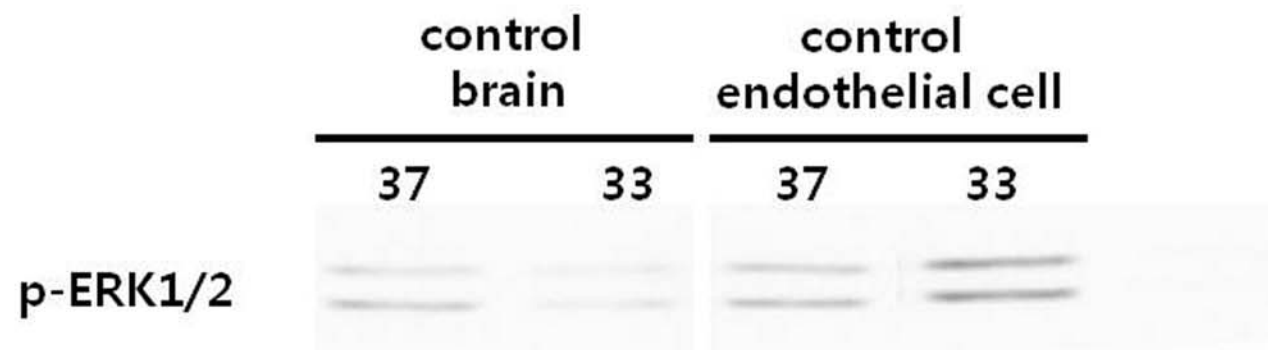

Supplement: f1 [file 846716.f1.pdf]

Supp fig. 2

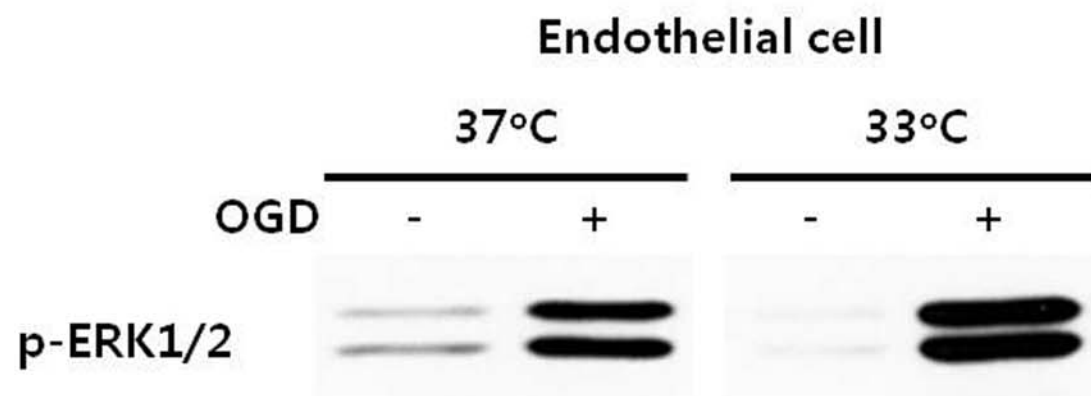

Supplement: f2 [file 846716.f2.pdf]

Supp fig. 3

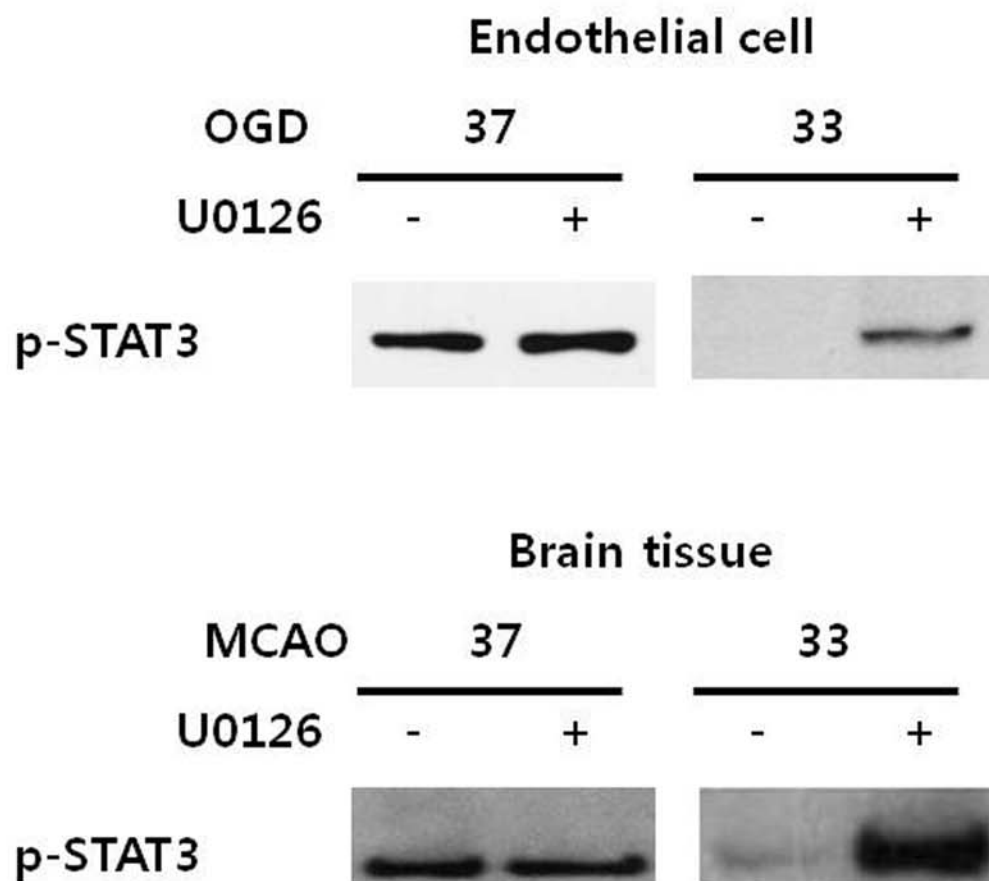

Supplement: f3 [file 846716.f3.pdf]
